# Supplementary material
Source: HighWire-hosted journal article supplement (https://bmjopen.bmj.com/content/6/4/e011061)
Supplement: inline-supplementary-material-1 [file inline-supplementary-material-1.pdf]

## Survey after free age-related cataract surgery in Guangzhou City

Follow up adherence by telephone: A. Successful; B. No telephone reply (trying >3 times at different time points); C. Refuse; D. Failure to understand the condition; E. Deafness; F. Others (eg. patient passed away after surgery)

### Basic information

Name:\_\_\_\_\_ Age:\_\_\_\_\_ Gender: ☐Male ☐Female

1. Who are living with you at present? (Multiple choices) A. None (reason:\_\_\_\_\_); B. Spouse; C. Children; D. Parents; E. Housekeeping staff; F. Others\_\_\_\_\_
2. What time was your cataract surgery? OD: \_\_\_\_ (Month/Year) post surgery, OS: \_\_\_\_ (Month/Year) post surgery.
3. Present naked visual acuity: OD\_\_ OS\_\_, corrected visual acuity: OD\_\_ OS\_\_ Wearing glasses in normal times? ☐Yes ☐No

### Patient resource

4. Address (District): ☐Yuexiu ☐Tianhe ☐Haizhu ☐Liwan ☐Baiyun ☐Huadu ☐Panyu ☐Conghua ☐Zengcheng ☐Huangpu ☐Nansha ☐Luogang
5. By which way were you informed of the free cataract surgery? A. Newspaper; B. Families or friends; C. Television news; D. Hospital propaganda material; E. Free clinic in parks; F. Recommendation from post surgery patients; G. WeChat; H. Others\_\_\_\_\_
6. In which park have you participated in the free clinic? A. Yuexiu Park; B. Dongshanhu Park; C. Tianhe Park; D. Renmin Park

### Health conditions

7. How long had you been aware of the cataract before the surgery? A. Not known; B. \_\_\_\_ Years; C. \_\_\_\_ Months
8. Had the visual acuity influenced your daily life before the surgery? A. No; B. slightly; C. moderately; D. severely
9. Did you have physical examinations in hospital before the cataract surgery within 5 years? A. No; B. Yes, only when feeling ill; C. Yes, regularly (e.g. units organized physical examinations, including eye examinations)
10. What were the reasons for your failure to the physical examinations? A. Not feeling ill; B. feeling ill slightly without influence on daily life; C. Traffic inconvenience; D. Difficult clinic registration; E. Dear medical expenses; F. Personal time arrangement problem; G. Family members time arrangement problem; H. Others\_\_\_\_\_
11. Have you ever been diagnosed of other diseases? A. Hypertension; B. Diabetes; C. Others\_\_\_\_\_
12. Education level: A. None; B. Primary school; C. Middle school; D. High school/ technical secondary school; E. College/University or above

### Reasons for choosing the free surgery

13. Why didn't you choose to accept the surgery until the free surgery activity? A. Financial problems; B. Fear of surgery; C. Unawareness of the surgery; D. Bad general condition; E. No access to the surgery without care from others
14. What do you think was the most important reason for you to participate in the free surgery activity? A. Financial problems; B. Reputation of Zhongshan Ophthalmic Center; C. propaganda of the activity; D. Recommendation from the other patients; E. Others\_\_\_\_\_
15. Family income per capita monthly(RMB): A. <1000; B. 1000~2999; C. 3000~4999; D. ≥5000

### Overall evaluation

16. What do you think of the cataract free clinic activity in parks? Please score it (0~10 points): \_\_\_\_
17. What do you think of the free surgery activity for age-related cataract patients? Please score it (0~10 points): \_\_\_\_

Investigated person: ☐patient ☐family members

Signature of investigator: \_\_\_\_\_

Date: \_\_\_\_\_
