# Supplementary material
Source: HighWire-hosted journal article supplement (https://bmjopen.bmj.com/content/6/4/e011061)
Supplement: inline-supplementary-material-2 [file inline-supplementary-material-2.pdf]

# 广州市免费老年性白内障手术回访调查表

电话调查回访情况记录: A. 成功回访; B. 无人接听 (不同时间尝试 3 次); C. 拒绝回访;  
D. 不了解情况; E. 耳聋; F. 其它原因 (如术后老人已去世)

## 基本信息

患者姓名: \_\_\_\_\_ 年龄: \_\_\_\_\_ 性别: ☐男 ☐女

1. 与您同住的人有哪些? (可多选) A. 无 (原因\_\_\_\_\_); B. 配偶; C. 子女; D. 父母; E. 家政陪护; F. 其他\_\_\_\_\_
2. 您什么时候做白内障手术? 现在是右眼术后\_\_\_\_\_月/年, 左眼术后\_\_\_\_\_月/年
3. 现在手术后裸眼视力 OD\_\_\_\_OS\_\_\_\_, 矫正视力 OD\_\_\_\_OS\_\_\_\_, 平时戴镜吗? ☐戴 ☐不戴

## 病人来源

4. 住址: ☐越秀区; ☐天河区; ☐海珠区; ☐荔湾区; ☐白云区; ☐花都区; ☐番禺区; ☐从化市; ☐增城市; ☐黄埔区; ☐南沙区; ☐萝岗区
5. 您是通过何种途径知道免费白内障手术的? A 报纸; B 家人或朋友告知; C 电视新闻宣传; D 医院宣传资料; E 公园义诊; F 已做手术的患者推荐; G 微信; H 其他\_\_\_\_\_
6. 参加了哪个公园义诊\_\_\_\_\_公园: A. 越秀; B. 东山湖; C. 天河; D. 人民

## 健康状况

7. 您手术前知道自己患白内障多长时间? A. 不知道; B. 知道\_\_\_\_\_年; C. 知道\_\_\_\_\_月
8. 您做手术前的视力已经影响生活了吗? A. 不影响 B. 轻微影响 C. 比较影响 D. 严重影响
9. 在这次白内障手术之前, 最近 5 年您是否去医院做过体检? A. 否; B. 不舒服时曾去过; C. 定期检查 (如单位体检, 且包含眼科项目)
10. 您没有做过检查的原因是 (可多选): A 身体没不舒服; B 有点不舒服, 但不影响工作生活; C 交通不便利; D 挂号难; E 看病贵; F 本人没时间; G 家人没时间; H 其它\_\_\_\_\_
11. 是否曾经在医院被确诊过其它疾病: A. 高血压; B. 糖尿病; C. 其它\_\_\_\_\_
12. 文化程度: A 未曾受教育; B 小学; C 初中; D 高中/中专; E 大学及以上

## 选择免费手术的原因

13. 您一直拖到这次活动才接受手术治疗的原因? A. 经济 B. 害怕手术 C. 不知可以手术 D. 全身情况差, 不允许手术 E. 无人照顾, 无法获得手术机会。
14. 您觉得什么原因促使您最终选择了参加免费手术活动? :A. 经济原因; B. 中山眼科中心的品牌; C. 免费活动的宣传策划; D. 其它患者推荐; E. 其它原因\_\_\_\_\_
15. 家庭人均月收入 (元): A. 低于 1000; B. 1000-2999; C. 3000-4999; D. 5000 以上

## 综合评价

16. 您如果对逛公园就可以参加白内障义诊的活动进行评分 0-10 分, 您给\_\_\_\_\_分
17. 您对这个免费老年性白内障手术的总体满意程度评分 0-10 分, 您给\_\_\_\_\_分

调查员签名: \_\_\_\_\_ 被调查者 (患者本人或家属): \_\_\_\_\_ 日期: \_\_\_\_\_
